# Supplementary material for: Comment on 'Accumbens cholinergic interneurons dynamically promote dopamine release and enable motivation'
Source: eLife. 2024 May 15;13:e95694. doi: 10.7554/eLife.95694 (PMC11095934; doi:10.7554/eLife.95694)
Supplement: Source data 1. [file elife-95694-data1.xlsx]

## Sheet: Sheet1
Fig. 1F							Fig. 1H											Fig. 1I													Fig. 1K
NAc			DLS				NAc					DLS						NAc						DLS							NAc			DLS
Reward	Blue light		Reward	Blue light			1 ms	2 ms	4 ms	6 ms		1 ms	2 ms	4 ms	6 ms			0.3 mW	0.5 mW	1.0 mW	2.0 mW	9.0 mW		0.3 mW	0.5 mW	1.0 mW	2.0 mW	9.0 mW			Saline	Reserpine		Saline	Reserpine
3.856	6.82		2.94	4.87			2.7	4.75	7.05	9.7		1.8	2.5	4.35	5.95			0.55	1.05	2	3.25	9.7		1	1.25	1.15	1.85	5.95			10.0664	13.1124		5.05979	8.12386
1.95	6.65		2.75	4.69			2.55	4.35	7.3	9.15		1.75	2.95	5.3	6			0.6	0.9	2.25	3.2	9.15		0.4	0.75	1.15	2.3	6			9.67969	12.1529		6.21485	8.72978
4.06	6.71		2.14	4.59			2.45	4.3	7.15	9.6		1.25	1.7	3.35	4.1			0.75	1.05	2	3.3	9.6		0.85	0.7	0.95	1.6	4.1			9.1219	14.0388		6.59953	11.8147
0.907	6.69		1.4	3.81			2.65	4.45	7.7	10.1		2.15	2.05	4.6	5.25			0.8	1.25	2.05	3.55	10.1		0.65	0.6	1.35	1.6	5.25			9.72417	13.6424		5.67003	12.5707
							2.12	3.935	6.71	8.595		1.9	3	4.6	5.8							8.595						5.8
							2.05	3.98	6.695	8.91		1.55	2.35	3.8	4.6							8.91						4.6
							2	4.5	6.5	9		1.7	2.9	4.7	6.2							9						6.2
							2	4.5	7	9		1.5	3	5	6.5							9						6.5
Fig. 2D
NAc
2.5 ms	5 ms	10 ms
0.997	1	0.987
1.024	0.968	0.978
1.026	0.958	0.991
1.049	1.055	0.948
1.082	0.999	0.955
1.062	1.063	1.034
1.086	1.005	1.001
0.956	0.959	0.958
